# Supplementary material for: In situ sorbent formation dispersive solid phase extraction for multi-elemental analysis: a new approach using cyclen and a magnetic ionic liquid
Source: Royal Society of Chemistry journal article supplement (doi:10.1039/d4ay01111b), 2025-01-01
Supplement: d4ay01111b1.pdf [file d4ay01111b1.pdf]

## Supplementary data

### **In-situ sorbent formation dispersive solid phase extraction for multi-elemental analysis in petroleum: A new approach using cyclen and magnetic ionic liquid**

Hasanain Najm Abed Altuwaijari<sup>1</sup>, Mohammad Reza Afshar Mogaddam<sup>2, 3,4,\*</sup>, Mir Ali Farajzadeh<sup>1,5,\*</sup>,  
Saeed Mohammad Sorouraddin<sup>1</sup>

<sup>1</sup>*Department of Analytical Chemistry, Faculty of Chemistry, University of Tabriz, Tabriz, Iran*

<sup>2</sup>*Food and Drug Safety Research Center, Tabriz University of Medical Sciences, Tabriz, Iran*

<sup>3</sup>*Research Center of New Material and Green Chemistry, Khazar University, 41 Mehseti Street, Baku  
AZ1096, Azerbaijan*

<sup>4</sup>*Pharmaceutical Analysis Research Center, Tabriz University of Medical Sciences, Tabriz, Iran*

<sup>5</sup>*Engineering Faculty, Near East University, 99138 Nicosia, North Cyprus, Mersin 10, Turkey*

\* Corresponding author: Professor M.A. Farajzadeh

E-mail address: mafarajzadeh@yahoo.com; mafarajzadeh@tabrizu.ac.ir

Tel.: +98 33393084

Fax: +98 33340191

\* Corresponding author: Dr. M.R. Afshar Mogaddam

E-mail address: mr.afsharmogaddam@yahoo.com; Afsharmogaddam@yahoo.com

### *Preparation of magnetic ionic liquids*

For preparation of [BMIM][FeCl<sub>4</sub>] and [HMIM][FeCl<sub>4</sub>] MILs, 1 mol FeCl<sub>3</sub> and was mixed with [BMIM]Cl and [HMIM]Cl under nitrogen stream and the mixtures were stirred for 12 h. The obtained liquid products were utilized in the extraction procedure. The steps of the MILs preparation were according to a literature [S1].

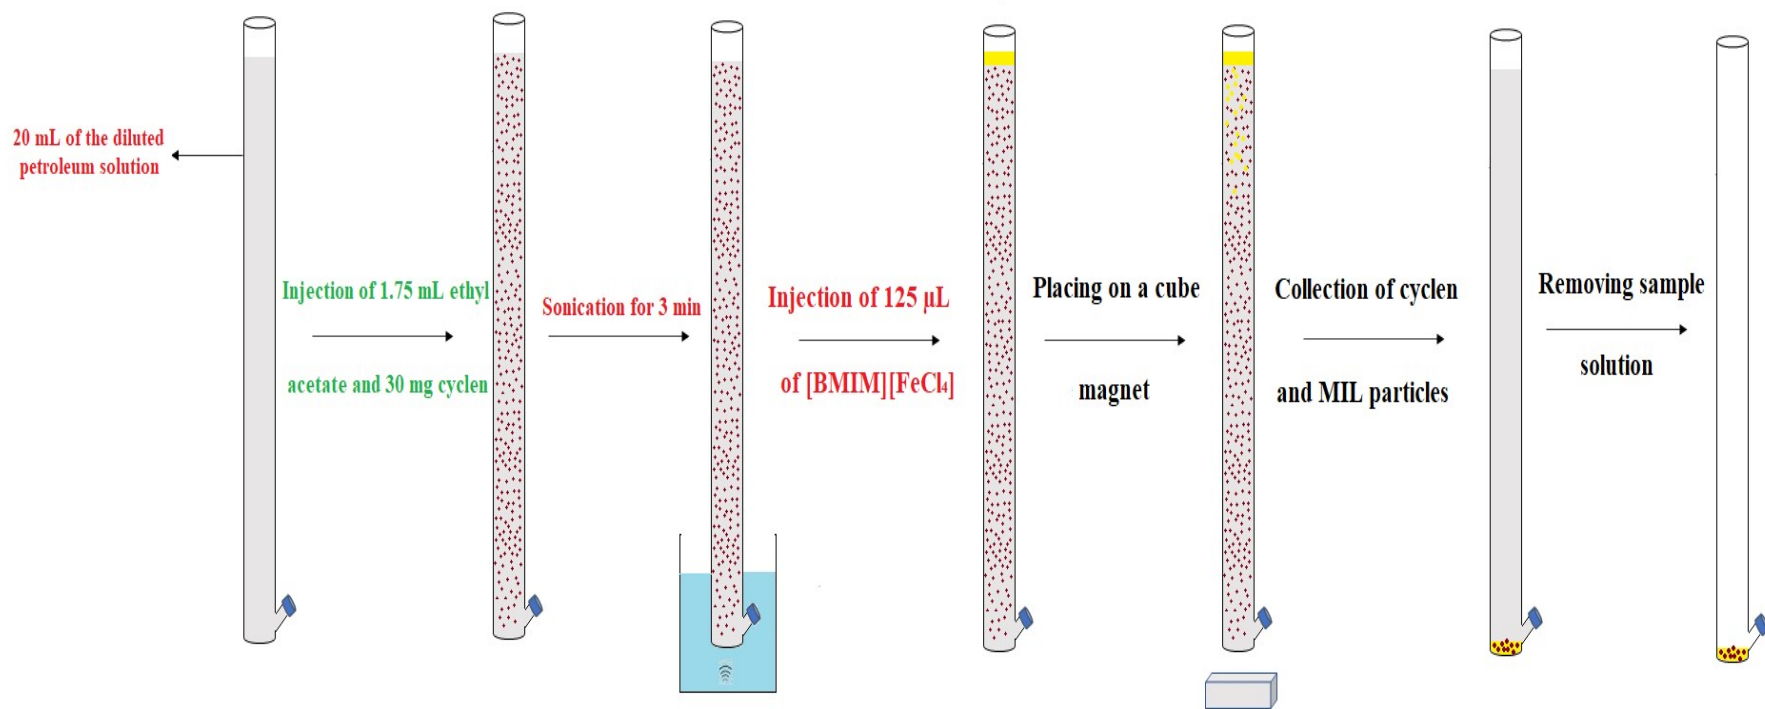

Fig. S1. Extraction method steps.

Table S1. Mean values of obtained the results by the standard method (ASTM D 5708) and the IS-DSPE-ICP-MS method.

| Cation                                                                                               | Crude sample #1             |                   |                          | Crude sample #2             |                   |             |
|------------------------------------------------------------------------------------------------------|-----------------------------|-------------------|--------------------------|-----------------------------|-------------------|-------------|
|                                                                                                      | ASTM D 5708 standard method | Introduced method | t statistic <sup>a</sup> | ASTM D 5708 standard method | Introduced method | t statistic |
| Both samples were analyzed without adding the studied analytes.                                      |                             |                   |                          |                             |                   |             |
| Ni                                                                                                   | 89.2 ± 0.19                 | 92.4 ± 0.03       | 1.36                     | 98.6 ± 0.07                 | 103.1 ± 4.3       | 1.96        |
| V                                                                                                    | 18.3 ± 0.10                 | 16.5 ± 0.06       | 1.54                     | 26.4 ± 0.08                 | 24.3 ± 1.2        | 0.79        |
| All samples were spiked with the cations at a concentration of 10 ng g <sup>-1</sup> . <sup>b)</sup> |                             |                   |                          |                             |                   |             |
| Ni                                                                                                   | 9.32 ± 0.03                 | 8.96 ± 0.05       | 1.56                     | 10.61 ± 0.03                | 11.3 ± 0.07       | 1.74        |
| V                                                                                                    | 8.96 ± 0.05                 | 9.63 ± 0.02       | 1.03                     | 9.85 ± 0.05                 | 10.8 ± 0.13       | 1.89        |

a) t-Critical=2.23 for n=4 and p=0.05

b) The analytes contents were subtracted.

Table S2. Analytical eco-scale values for the introduced method [S2].

| Parameter           | Penalty point       |            |
|---------------------|---------------------|------------|
| Energy              | ≤1.5 kWh per sample | 1          |
| Instrumentation     | ICP-MS              | 1          |
| Sample amount       | < 10 mL             | 1          |
| Waste               | 10-100 mL           | 2          |
| Cyclohexane         | Hazardous           | 8          |
| Cyclen              |                     | Probably 1 |
| MIL                 |                     | 0          |
| Total penalty point |                     | 13         |
| AES                 |                     | 87         |

## References

- [S1] X. Li, Q. Zhou, X. L and S. Zhang, Densities and viscosities of binary mixtures of magnetic ionic liquids 1-alkyl-3-methylimidazolium tetrachloroferrate with ethyl acetate at temperatures (293.15 to 323.15) K. *J. Mol. Liq.* 2019, **243**, 285-292.
- [S2] A. Gałuszka, Z.M. Migaszewski, P. Konieczka and J.Namieśnik, Analytical Eco-Scale for assessing the greenness of analytical procedures, *Trends Anal. Chem.* 2012, **37**, 61-72.
